# Supplementary material for: Discovery of potential VEGFR-2 inhibitors from natural products by virtual screening and molecular dynamics simulation
Source: Royal Society of Chemistry journal article supplement (doi:10.1039/d4cp03575e), 2025-01-01
Supplement: d4cp03575e1.pdf [file d4cp03575e1.pdf]

## Supporting Information

### Discovery of Potential VEGFR-2 Inhibitors from Natural Products by Virtual Screening and Molecular Dynamics Simulation

Qiong Xie<sup>1</sup>, Mengshi Luo<sup>1</sup>, Mingyan Liu<sup>1</sup>, Yuxin Xie<sup>1</sup>, Di Li<sup>1</sup>, Hongjing Dai<sup>1,2</sup>,  
Xiaohua Chen<sup>1,\*</sup>

<sup>1</sup> Chongqing Key Laboratory of Theoretical and Computational Chemistry, School of Chemistry  
and Chemical Engineering, Chongqing University, Chongqing, 401331, P. R. China

<sup>2</sup> School of Chemistry and Chemical Engineering, Qiannan Normal University for Nationalities,  
Duyun 558000, P. R. China

**Table S1.** The docking score of 96 compounds and the calculated binding free energies after 10 ns MD simulations.

| Compound code | Docking score | $\Delta G_{\text{calc}}$ (kcal/mol) | Compound code | Docking score | $\Delta G_{\text{calc}}$ (kcal/mol) |
|---------------|---------------|-------------------------------------|---------------|---------------|-------------------------------------|
| CNP0011393    | -11.57        | -38.57                              | CNP0171333    | -11.48        | -31.87                              |
| CNP0097185    | -11.16        | -50.69                              | CNP0011148    | -11.32        | -40.18                              |
| CNP0037721    | -11.13        | -32.55                              | CNP0011011    | -10.74        | -26.62                              |
| CNP0011062    | -10.82        | -48.85                              | CNP0048386    | -10.68        | -65.39                              |
| CNP0028810    | -10.81        | -66.71                              | CNP0390700    | -10.67        | -50.92                              |
| CNP0011147    | -10.77        | -40.40                              | CNP0138306    | -10.65        | -24.80                              |
| CNP0047340    | -10.69        | -52.32                              | CNP0027093    | -10.58        | -40.16                              |
| CNP0240557    | -10.63        | -56.24                              | CNP0011430    | -10.53        | -31.44                              |
| CNP0069582    | -10.42        | -52.98                              | CNP0012015    | -10.52        | -39.27                              |
| CNP0011435    | -10.40        | -56.49                              | CNP0033907    | -10.45        | -64.96                              |
| CNP0190525    | -10.31        | -57.87                              | CNP0132005    | -10.40        | -47.98                              |
| CNP0065469    | -10.25        | -49.02                              | CNP0132719    | -10.39        | -60.33                              |
| CNP0024354    | -10.13        | -34.54                              | CNP0362710    | -10.36        | -52.46                              |
| CNP0279782    | -10.12        | -40.39                              | CNP0011149    | -10.31        | -40.75                              |
| CNP0047068    | -10.06        | -54.37                              | CNP0011400    | -10.26        | -34.41                              |
| CNP0041068    | -10.03        | -50.81                              | CNP0097644    | -10.16        | -50.20                              |
| CNP0006035    | -10.02        | -38.04                              | CNP0010948    | -10.15        | -39.89                              |
| CNP0036194    | -10.01        | -54.32                              | CNP0177683    | -10.09        | -64.32                              |
| CNP0076764    | -9.93         | -68.80                              | CNP0069877    | -10.07        | -53.29                              |
| CNP0276471    | -9.88         | -48.39                              | CNP0410951    | -10.03        | -57.13                              |
| CNP0006035    | -9.75         | -28.00                              | CNP0064258    | -10.02        | -52.48                              |

\*The corresponding authors: Xiaohua Chen, [chxh7@cqu.edu.cn](mailto:chxh7@cqu.edu.cn)

|            |        |        |
|------------|--------|--------|
| CNP0005627 | -9.37  | -44.27 |
| CNP0161586 | -9.06  | -27.92 |
| CNP0383938 | -9.92  | -33.67 |
| CNP0014631 | -9.66  | -36.64 |
| CNP0152032 | -9.36  | -33.71 |
| CNP0102334 | -9.23  | -35.23 |
| CNP0011394 | -10.95 | -38.52 |
| CNP0010973 | -10.46 | -35.23 |
| CNP0055793 | -10.28 | -54.28 |
| CNP0273747 | -10.02 | -51.73 |
| CNP0198475 | -10.82 | -42.00 |
| CNP0335080 | -10.54 | -26.84 |
| CNP0253363 | -10.32 | -45.31 |
| CNP0025086 | -10.20 | -53.40 |
| CNP0105843 | -10.14 | -47.35 |
| CNP0166084 | -10.10 | -48.05 |
| CNP0251686 | -10.72 | -47.44 |
| CNP0224199 | -10.43 | -41.07 |
| CNP0107283 | -10.23 | -59.18 |
| CNP0027531 | -10.06 | -32.99 |
| CNP0045431 | -10.79 | -44.90 |
| CNP0015235 | -10.56 | -40.91 |
| CNP0194704 | -10.22 | -57.49 |
| CNP0014757 | -11.21 | -33.95 |
| CNP0185474 | -10.34 | -34.50 |
| CNP0347649 | -10.66 | -34.80 |
| CNP0241425 | -10.24 | -51.7  |

|            |        |        |
|------------|--------|--------|
| CNP0131150 | -9.98  | -59.59 |
| CNP0066065 | -9.97  | -47.63 |
| CNP0298946 | -9.78  | -33.14 |
| CNP0321712 | -9.50  | -37.21 |
| CNP0101828 | -9.24  | -37.41 |
| CNP0027272 | -11.10 | -53.33 |
| CNP0040948 | -10.71 | -48.17 |
| CNP0006919 | -10.42 | -47.5  |
| CNP0037934 | -10.23 | -63.09 |
| CNP0050751 | -9.28  | -49.7  |
| CNP0011260 | -10.82 | -34.15 |
| CNP0335080 | -10.45 | -31.28 |
| CNP0181003 | -10.22 | -46.50 |
| CNP0117845 | -10.18 | -56.98 |
| CNP0302585 | -10.13 | -41.74 |
| CNP0163236 | -10.08 | -49.99 |
| CNP0297577 | -10.58 | -57.24 |
| CNP0014499 | -10.37 | -49.10 |
| CNP0145371 | -10.07 | -52.95 |
| CNP0117193 | -11.49 | -56.11 |
| CNP0150175 | -10.59 | -44.23 |
| CNP0036421 | -10.30 | -44.52 |
| CNP0037585 | -10.14 | -50.78 |
| CNP0014646 | -11.08 | -39.63 |
| CNP0040730 | -12.30 | -41.97 |
| CNP0048899 | -10.31 | -49.86 |

**Table S2.** Energy contributions of hot residues for the binding inhibitors in VEGFR-2.

|            | $\Delta E_{\text{vdw}}$<br>(kcal/mol) | $\Delta E_{\text{ele}}$<br>(kcal/mol) | $\Delta G_{\text{pol}}$<br>(kcal/mol) | $\Delta G_{\text{nopol}}$<br>(kcal/mol) | $\Delta G_{\text{calc}}$<br>(kcal/mol) |
|------------|---------------------------------------|---------------------------------------|---------------------------------------|-----------------------------------------|----------------------------------------|
| Leu840     |                                       |                                       |                                       |                                         |                                        |
| CNP0076764 | -0.72                                 | 0.01                                  | 0.14                                  | -0.14                                   | -0.71                                  |
| CNP0028810 | -2.11                                 | -0.27                                 | 0.63                                  | -0.33                                   | -2.08                                  |
| CNP0177683 | -2.03                                 | -0.18                                 | 0.59                                  | -0.33                                   | -1.95                                  |
| CNP0132719 | -1.90                                 | 0.15                                  | 0.22                                  | -0.33                                   | -1.86                                  |
| CNP0107283 | -1.32                                 | 0.22                                  | -0.10                                 | -0.22                                   | -1.42                                  |
| sorafenib  | -1.34                                 | -0.09                                 | 0.29                                  | -0.22                                   | -1.36                                  |
| Val848     |                                       |                                       |                                       |                                         |                                        |
| CNP0076764 | -1.05                                 | 0.18                                  | -0.14                                 | -0.09                                   | -1.09                                  |
| CNP0028810 | -1.32                                 | -0.12                                 | 0.08                                  | -0.13                                   | -1.49                                  |
| CNP0177683 | -1.53                                 | -0.19                                 | 0.10                                  | -0.14                                   | -1.76                                  |
| CNP0132719 | -1.27                                 | 0.15                                  | -0.05                                 | -0.13                                   | -1.29                                  |
| CNP0107283 | -1.14                                 | 0.49                                  | -0.53                                 | -0.13                                   | -1.30                                  |
| sorafenib  | -0.86                                 | 0.02                                  | -0.07                                 | -0.08                                   | -0.99                                  |
| Lys868     |                                       |                                       |                                       |                                         |                                        |
| CNP0076764 | -1.59                                 | -8.23                                 | 3.80                                  | -0.18                                   | -6.20                                  |
| CNP0028810 | -1.57                                 | 7.88                                  | -4.88                                 | -0.10                                   | 1.32                                   |
| CNP0177683 | -1.42                                 | 7.30                                  | -4.97                                 | -0.08                                   | 0.81                                   |
| CNP0132719 | -1.85                                 | -0.72                                 | 1.98                                  | -0.15                                   | -0.73                                  |
| CNP0107283 | -0.85                                 | 34.59                                 | -32.32                                | -0.09                                   | 1.34                                   |
| sorafenib  | -1.71                                 | 9.69                                  | -7.09                                 | -0.11                                   | 0.78                                   |
| Glu885     |                                       |                                       |                                       |                                         |                                        |
| CNP0076764 | -1.49                                 | -1.75                                 | 4.42                                  | -0.10                                   | 1.08                                   |
| CNP0028810 | 0.88                                  | -23.09                                | 14.91                                 | -0.15                                   | -7.45                                  |
| CNP0177683 | 0.23                                  | -19.31                                | 14.04                                 | -0.14                                   | -5.18                                  |
| CNP0132719 | -1.29                                 | 1.31                                  | 0.24                                  | -0.11                                   | 0.15                                   |
| CNP0107283 | 0.90                                  | -58.53                                | 51.39                                 | -0.11                                   | -6.35                                  |
| sorafenib  | -0.39                                 | -20.08                                | 16.65                                 | -0.15                                   | -3.97                                  |
| Leu889     |                                       |                                       |                                       |                                         |                                        |
| CNP0076764 | -1.75                                 | 0.03                                  | 0.06                                  | -0.18                                   | -1.83                                  |
| CNP0028810 | -1.55                                 | 0.36                                  | -0.25                                 | -0.14                                   | -1.58                                  |
| CNP0177683 | -1.33                                 | 0.15                                  | -0.05                                 | -0.16                                   | -1.39                                  |
| CNP0132719 | -1.48                                 | -0.15                                 | 0.21                                  | -0.18                                   | -1.60                                  |
| CNP0107283 | -1.17                                 | 1.40                                  | -1.21                                 | -0.14                                   | -1.12                                  |
| sorafenib  | -1.55                                 | 0.63                                  | -0.49                                 | -0.15                                   | -1.56                                  |
| Val899     |                                       |                                       |                                       |                                         |                                        |
| CNP0076764 | -1.67                                 | 0.14                                  | 0.26                                  | -0.10                                   | -1.37                                  |
| CNP0028810 | -1.64                                 | -0.26                                 | 0.44                                  | -0.09                                   | -1.55                                  |

|            |       |        |       |       |       |
|------------|-------|--------|-------|-------|-------|
| CNP0177683 | -1.41 | -0.01  | 0.27  | -0.08 | -1.23 |
| CNP0132719 | -1.57 | 0.24   | -0.03 | -0.07 | -1.43 |
| CNP0107283 | -1.83 | -1.29  | 2.06  | -0.12 | -1.19 |
| sorafenib  | -1.28 | -0.13  | 0.21  | -0.07 | -1.26 |
| Val916     |       |        |       |       |       |
| CNP0076764 | -1.38 | -0.05  | 0.05  | -0.14 | -1.52 |
| CNP0028810 | -1.28 | -0.22  | 0.18  | -0.15 | -1.47 |
| CNP0177683 | -1.38 | 0.17   | -0.10 | -0.14 | -1.45 |
| CNP0132719 | -1.08 | -0.03  | 0.12  | -0.14 | -1.13 |
| CNP0107283 | -0.80 | 1.36   | -1.16 | -0.11 | -0.71 |
| sorafenib  | -1.20 | 0.07   | -0.03 | -0.16 | -1.32 |
| Leu1035    |       |        |       |       |       |
| CNP0076764 | -1.28 | 0.01   | 0.08  | -0.15 | -1.33 |
| CNP0028810 | -1.86 | -0.11  | 0.24  | -0.15 | -1.89 |
| CNP0177683 | -1.65 | -0.24  | 0.22  | -0.15 | -1.82 |
| CNP0132719 | -1.81 | 0.08   | -0.01 | -0.15 | -1.88 |
| CNP0107283 | -1.49 | -0.04  | 0.18  | -0.17 | -1.53 |
| sorafenib  | -1.31 | -0.16  | 0.23  | -0.12 | -1.37 |
| Cys1045    |       |        |       |       |       |
| CNP0076764 | -2.25 | 0.01   | 0.87  | -0.14 | -1.51 |
| CNP0028810 | -2.05 | -1.68  | 1.20  | -0.09 | -2.63 |
| CNP0177683 | -1.76 | -2.43  | 1.19  | -0.10 | -3.10 |
| CNP0132719 | -2.41 | -0.07  | 1.26  | -0.11 | -1.33 |
| CNP0107283 | -2.45 | 3.14   | -2.09 | -0.19 | -1.59 |
| sorafenib  | -1.84 | -1.74  | 0.80  | -0.11 | -2.88 |
| Asp1046    |       |        |       |       |       |
| CNP0076764 | -3.03 | -2.05  | 4.64  | -0.28 | -0.71 |
| CNP0028810 | 2.56  | -2.71  | 3.38  | -0.27 | -2.15 |
| CNP0177683 | -2.60 | -2.26  | 3.03  | -0.25 | -2.08 |
| CNP0132719 | -2.72 | 1.05   | 0.41  | -0.22 | -1.49 |
| CNP0107283 | -0.52 | -58.58 | 53.31 | -0.27 | -6.06 |
| sorafenib  | -2.35 | -4.54  | 4.47  | -0.24 | -2.65 |
| Phe1047    |       |        |       |       |       |
| CNP0076764 | -2.21 | -0.25  | 0.49  | -0.11 | -2.07 |
| CNP0028810 | -2.43 | -0.59  | 1.23  | -0.15 | -1.94 |
| CNP0177683 | -2.31 | 0.10   | 1.01  | -0.15 | -1.35 |
| CNP0132719 | -2.91 | -0.48  | 0.47  | -0.17 | -3.08 |
| CNP0107283 | -2.01 | -0.35  | 0.74  | -0.15 | -1.76 |
| sorafenib  | -2.07 | -0.80  | 1.22  | -0.18 | -1.84 |

(A)

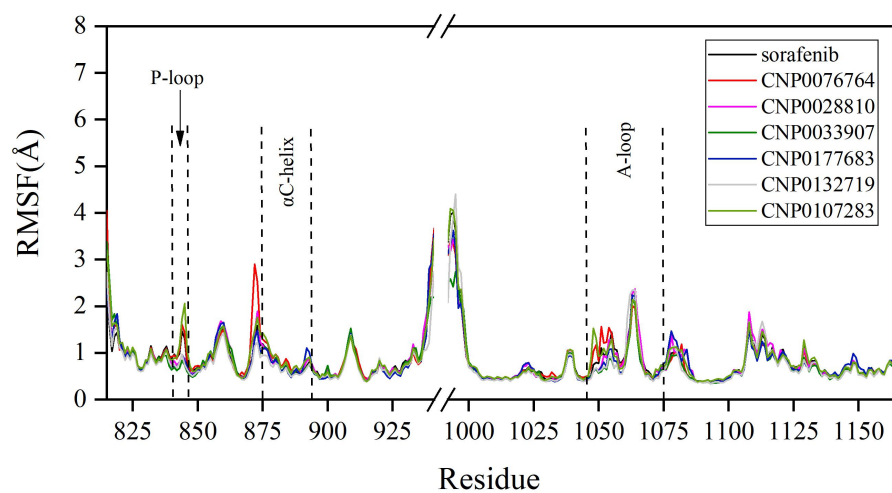

(B)

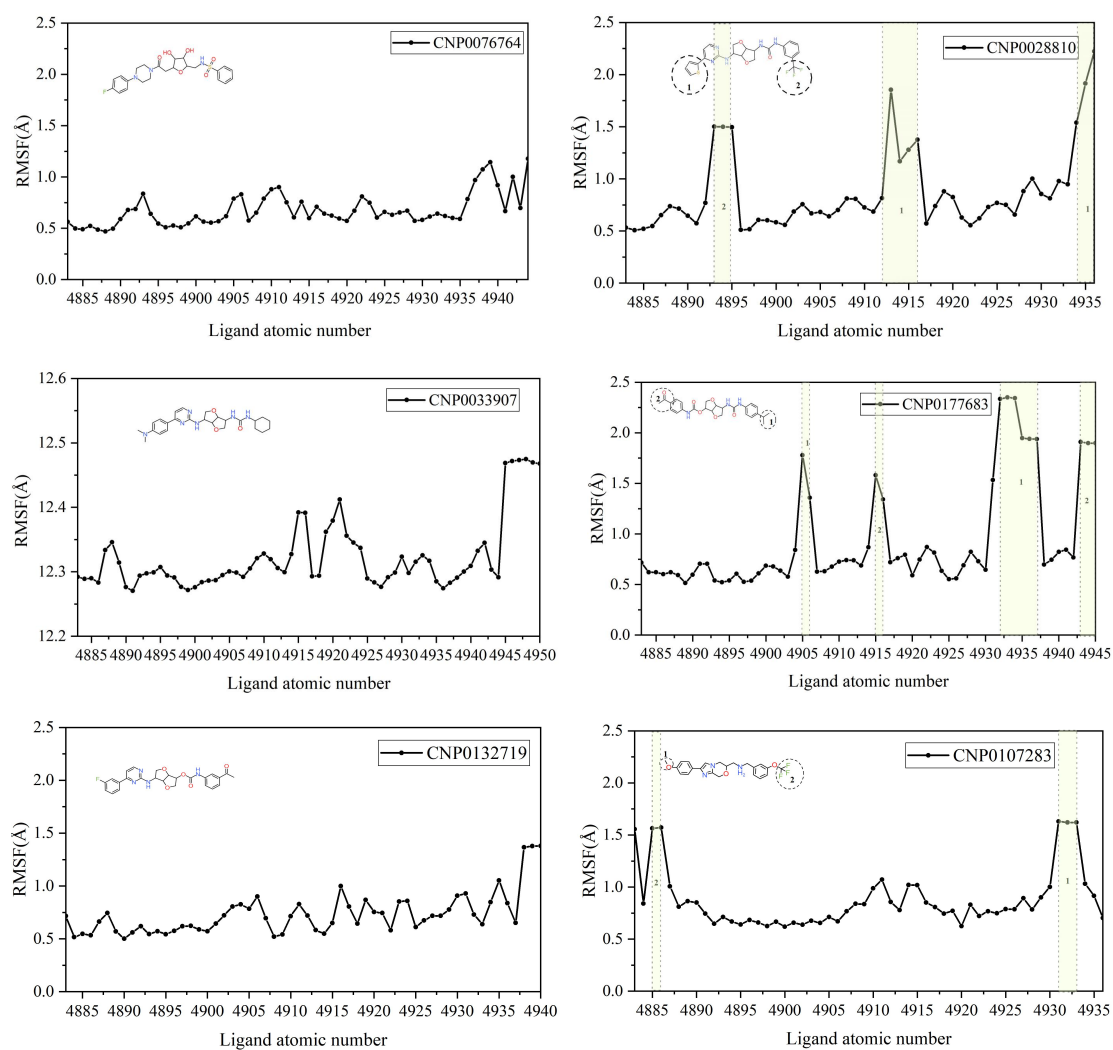

**Figure S1.** (A) The RMSF of protein  $\alpha$  atoms for the seven ligand-docking complexes; (B) The RMSF of the individual atoms of the inhibitors

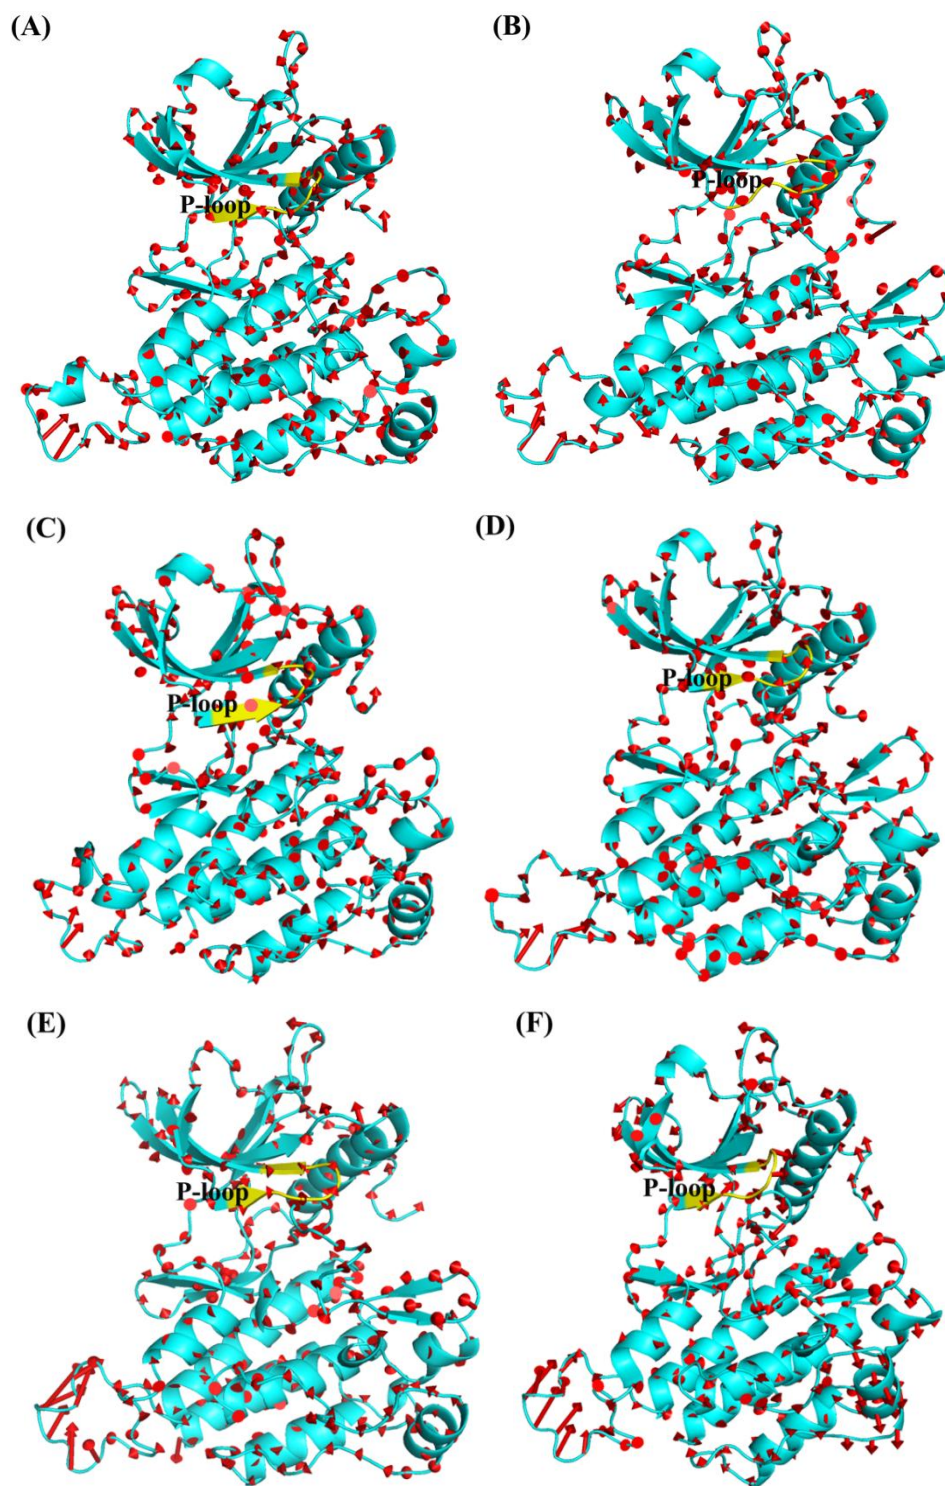

**Figure S2.** The first eigenvector porcupine plot for (A) sorafenib/VEGFR-2, (B) CNP0076764/VEGFR-2, (C) CNP0028810/VEGFR-2, (D) CNP0177683/VEGFR-2, (E) CNP0132719/VEGFR-2 and (F) CNP0107283/VEGFR-2. The P-loop includes Gly841, Arg842, Gly843, Ala844, Phe845 and Gly846, as depicted as yellow. The length of the arrow denotes the extent of movement of the corresponding part.

(A)

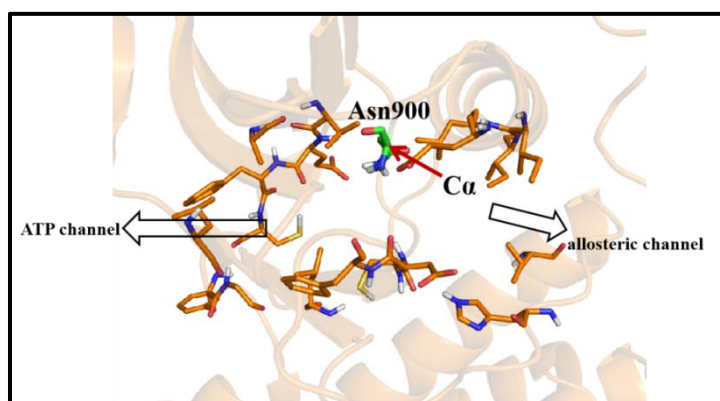

(B)

| Name       | Inhibitor Structure | ATP channel       | Allosteric channel |
|------------|---------------------|-------------------|--------------------|
| sorafenib  |                     | Asn900@Ca<br>→C23 | Asn900@Ca<br>→C2   |
| CNP0076764 |                     | Asn900@Ca<br>→C4  | Asn900@Ca<br>→C15  |
| CNP0028810 |                     | Asn900@Ca<br>→C18 | Asn900@Ca<br>→C2   |
| CNP0177683 |                     | Asn900@Ca<br>→C18 | Asn900@Ca<br>→C15  |
| CNP0132719 |                     | Asn900@Ca<br>→C15 | Asn900@Ca<br>→C22  |
| CNP0107283 |                     | Asn900@Ca<br>→C19 | Asn900@Ca<br>→C6   |

**Figure S3.** (A) Overview of the binding site of VEGFR-2; (B) The direction of inhibitors dissociated from the binding site.



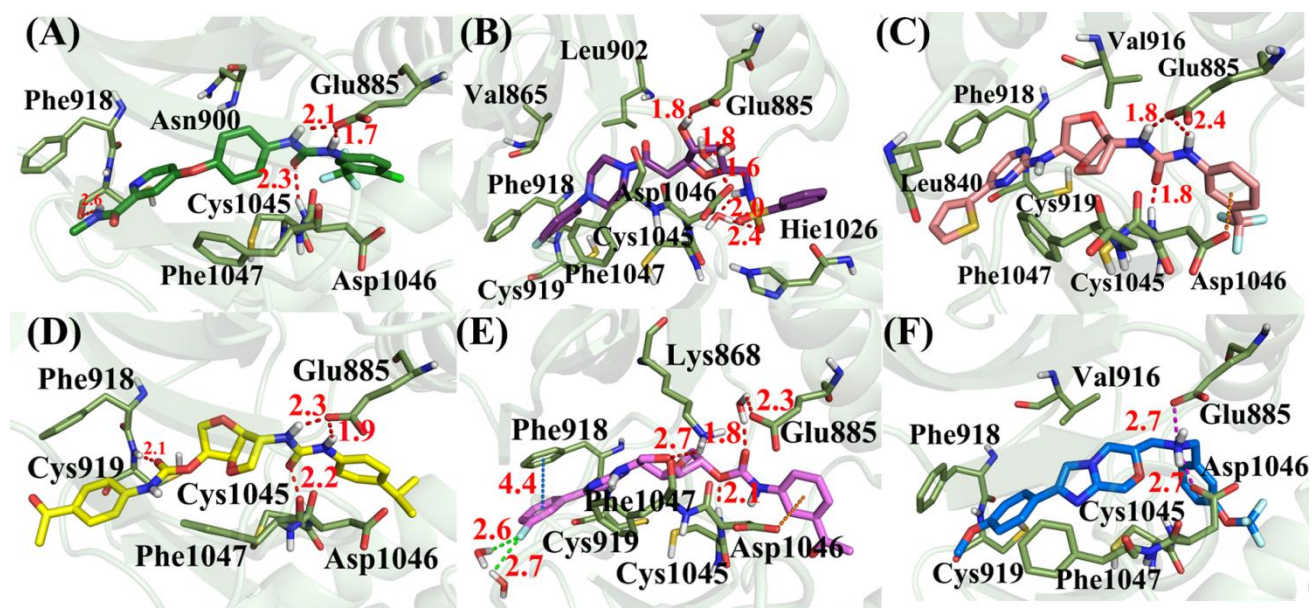

**Figure S4.** Representative structures of inhibitors binding to the VEGFR-2 from QM/MM MD trajectories. A-F are the binding conformations of sorafenib, CNP0076764, CNP0028810, CNP0177683, CNP0132719 and CNP0107283, respectively. The hydrogen bond interactions are depicted as red dotted lines. The salt bridges are depicted as magenta dotted lines. The  $\pi$ - $\pi$  interactions are depicted as blue dotted lines, and the anion- $\pi$  interactions are depicted as orange dotted lines.



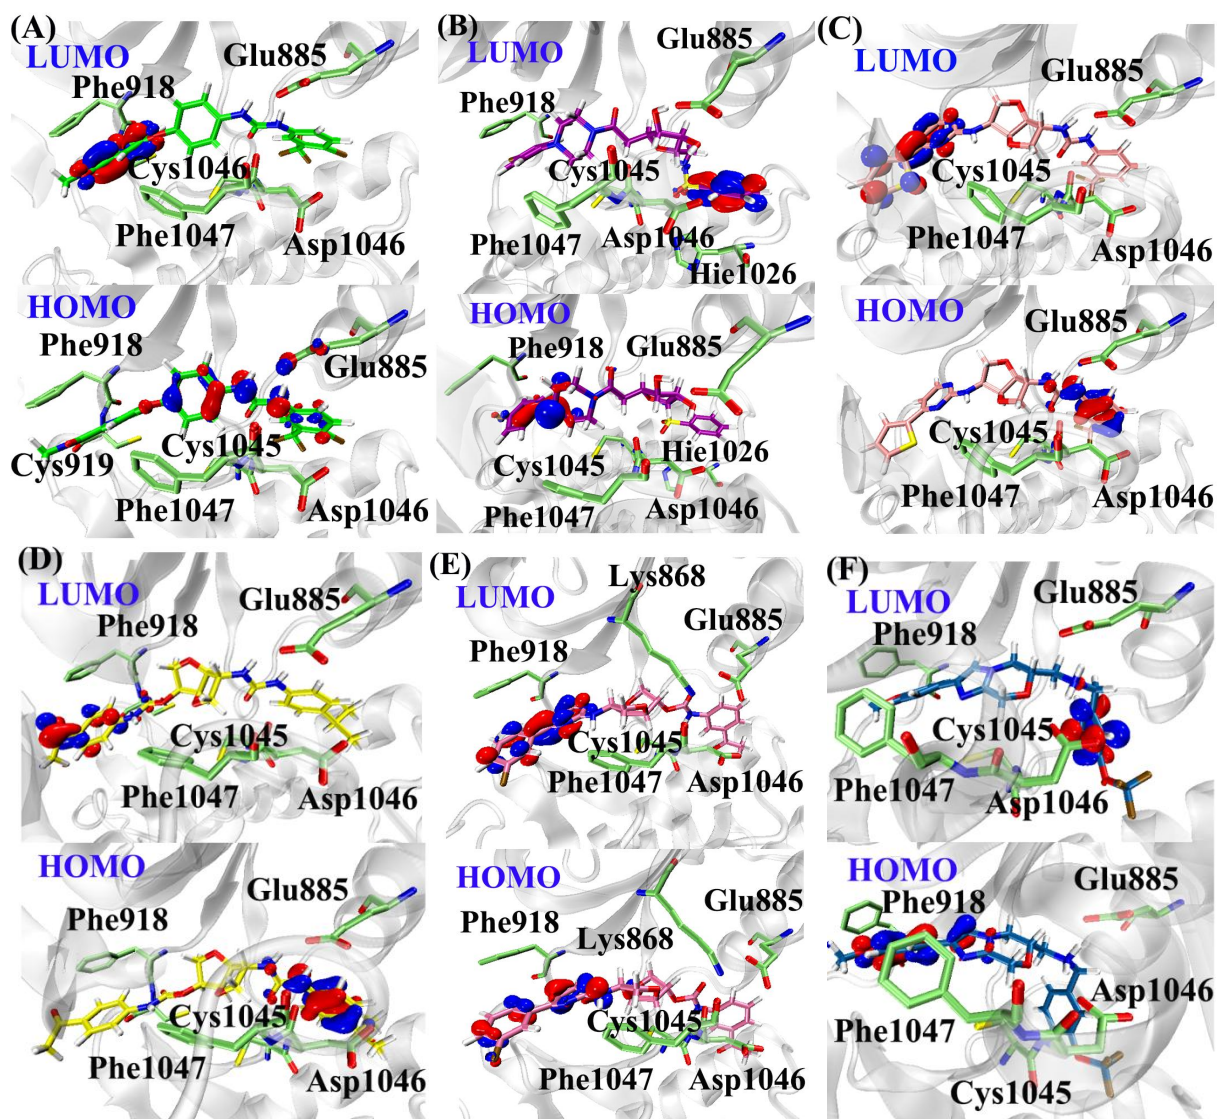

**Figure S5.** HOMO and LUMO contours imposed on VEGFR-2 ligands. A-F are sorafenib, CNP0076764, CNP0028810, CNP0177683, CNP0132719 and CNP0107283 binding to VEGFR-2, respectively.

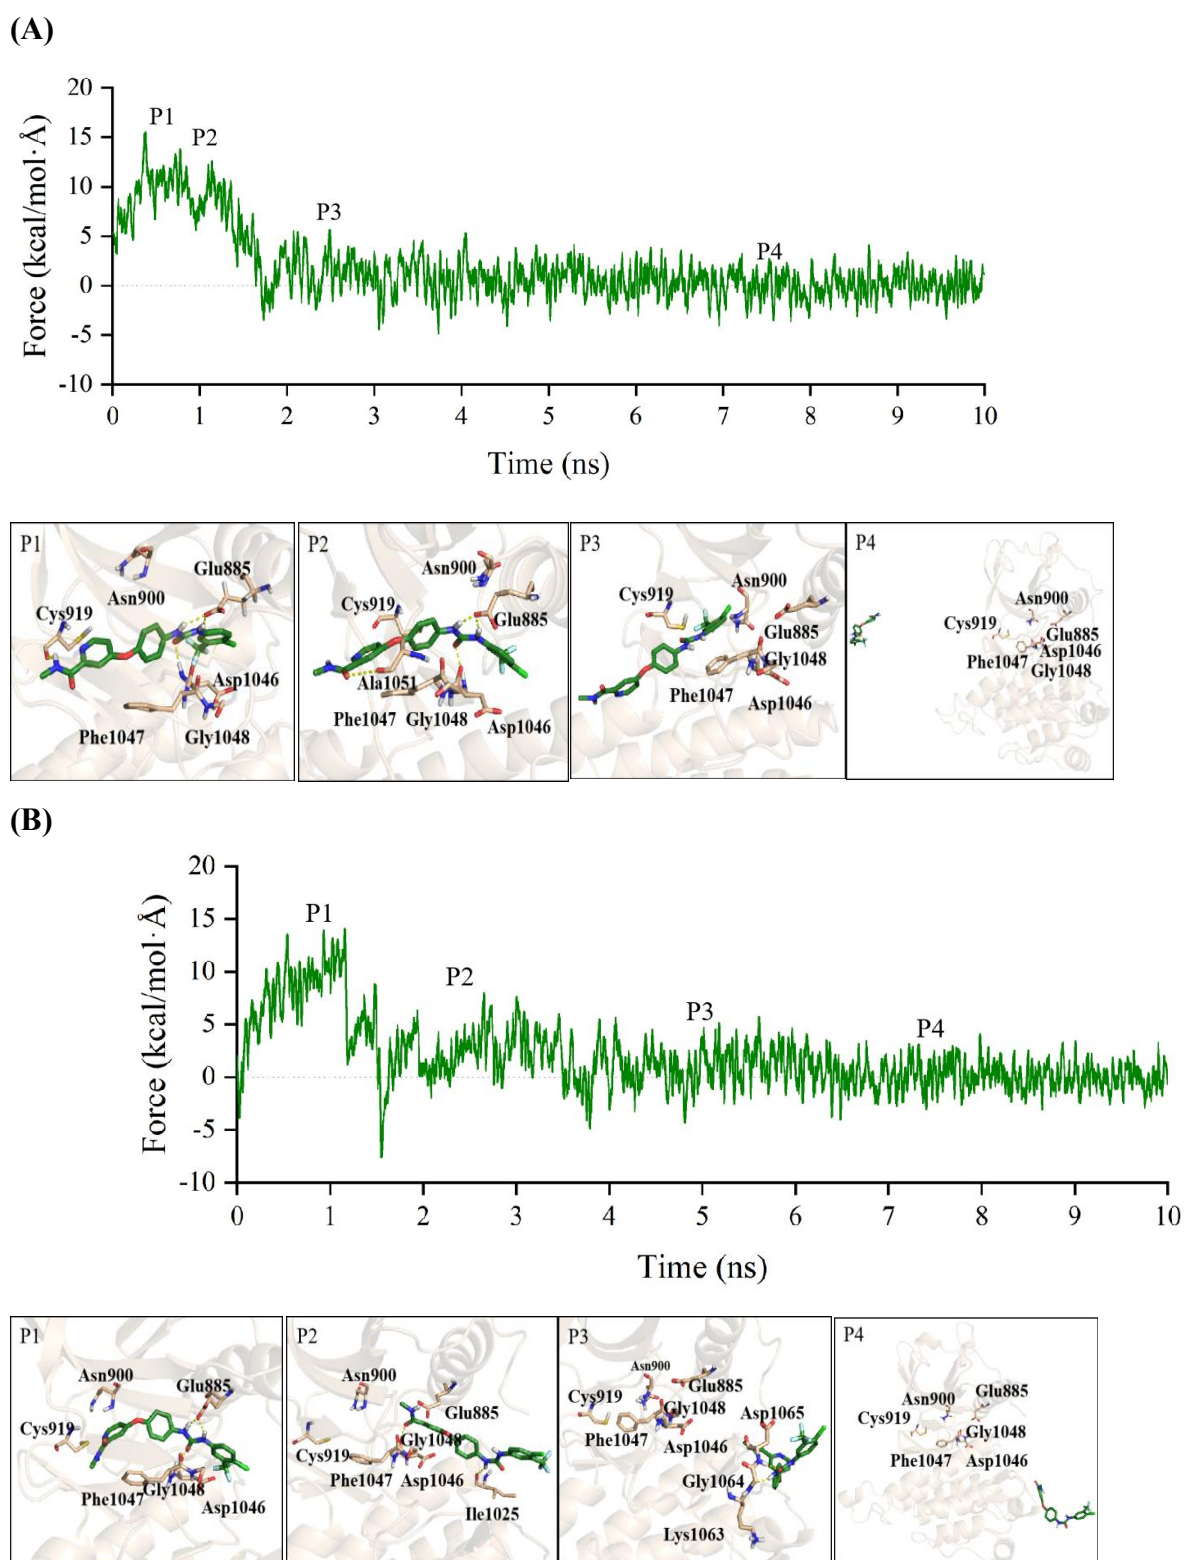

**Figure S6.** Force vs time of sorafenib dissociated from the binding site of VEGFR-2 and extracted snapshots for the relative positions of sorafenib and VEGFR-2 (A) along ATP channel and (B) along allosteric channel.

(A)

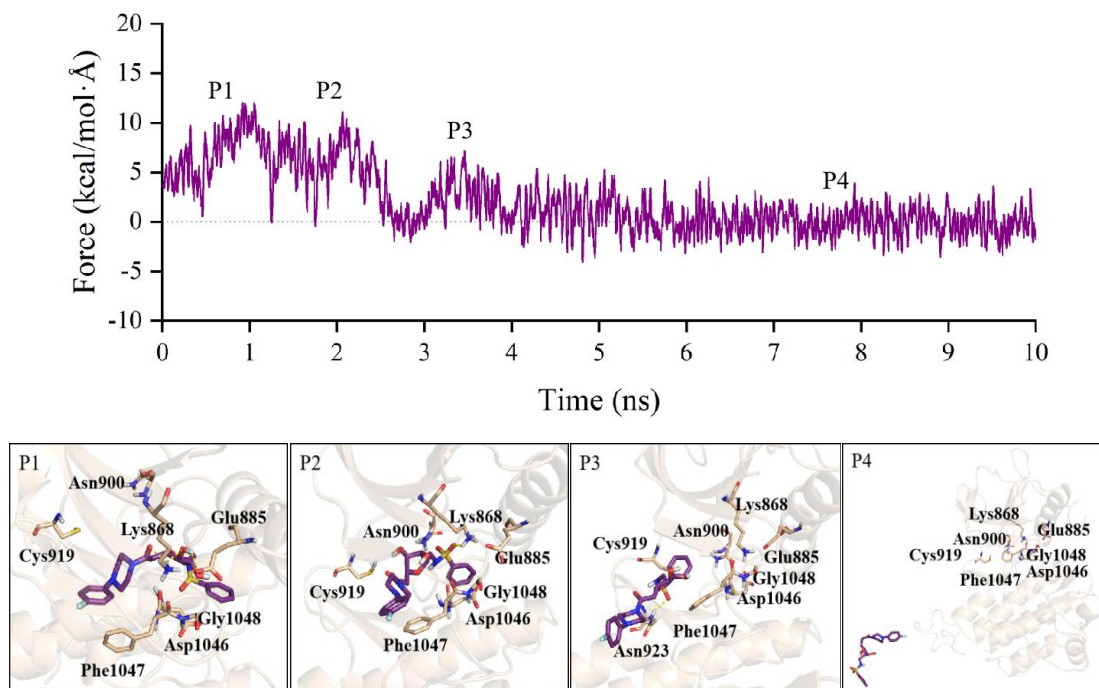

(B)

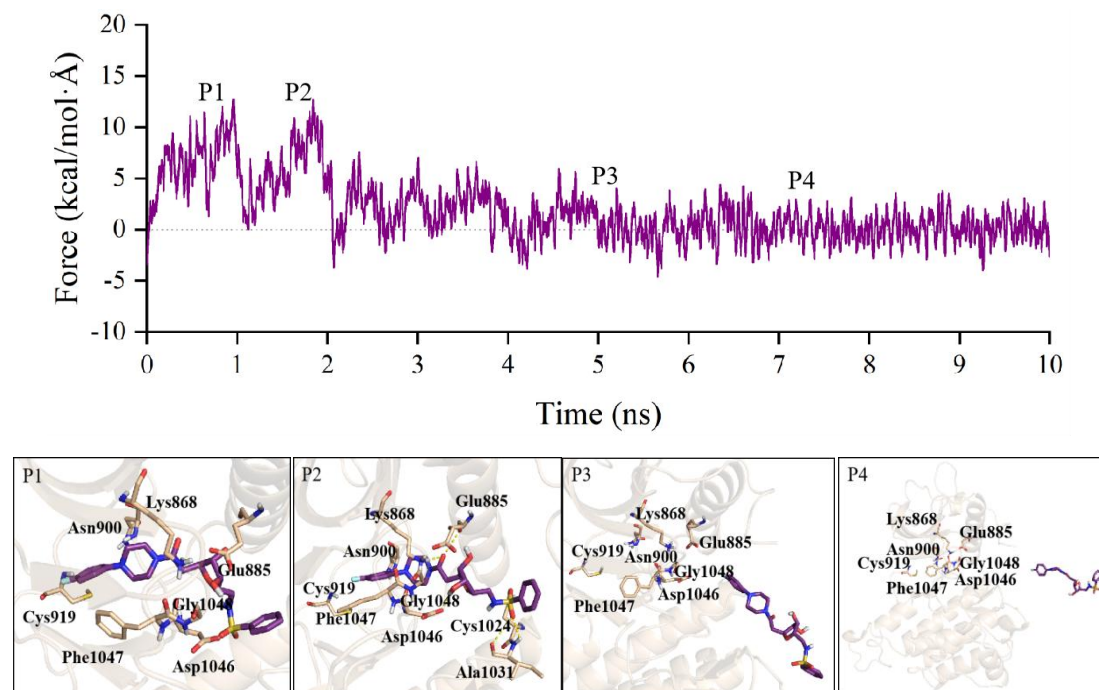

**Figure S7.** Force vs time of CNP0076764 dissociated from the binding site of VEGFR-2 and extracted snapshots for the relative positions of CNP0076764 and VEGFR-2 (A) along ATP channel and (B) along allosteric channel.



(A)

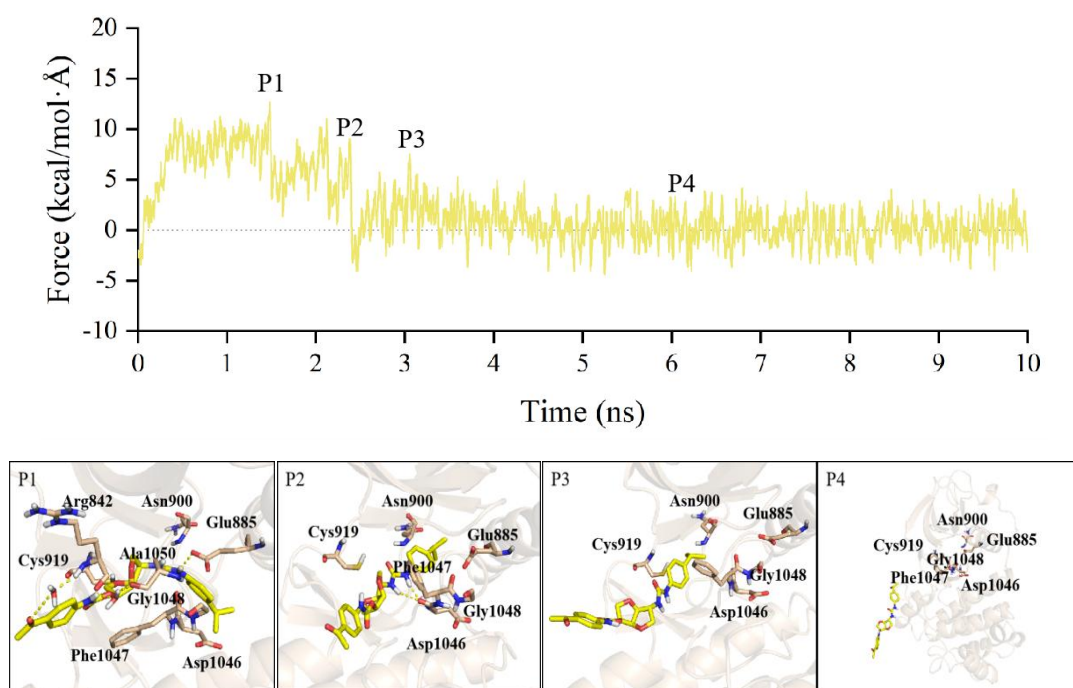

(B)

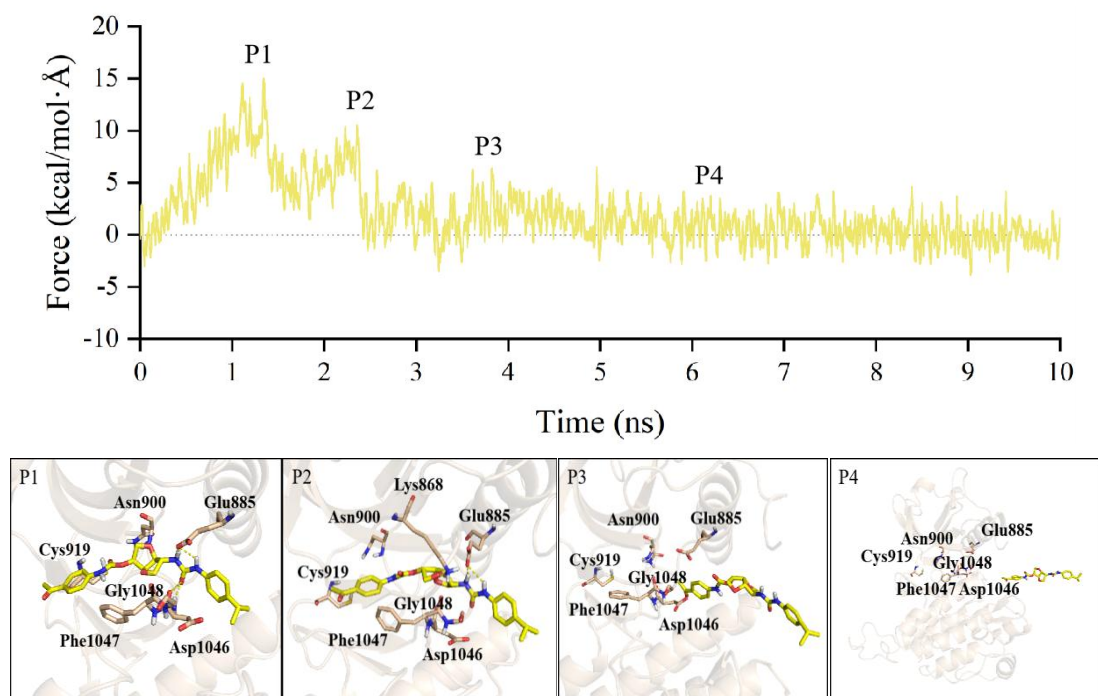

**Figure S8.** Force vs time of CNP0177683 dissociated from the binding site of VEGFR-2 and extracted snapshots for the relative positions of CNP0177683 and VEGFR-2 (A) along ATP channel and (B) along allosteric channel.

(A)

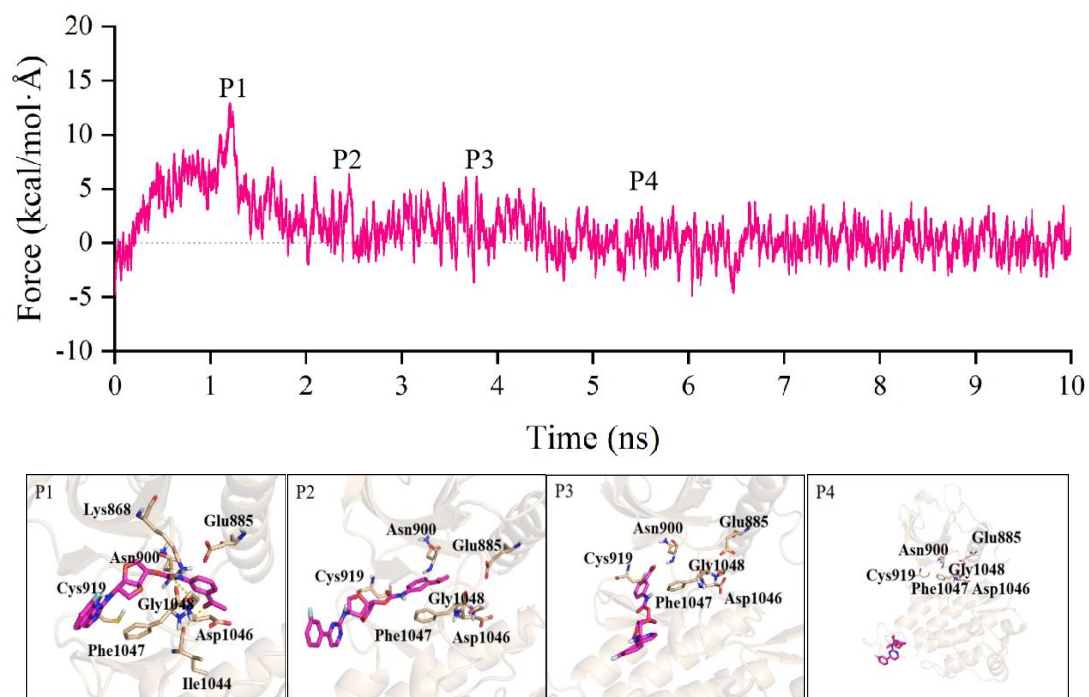

(B)

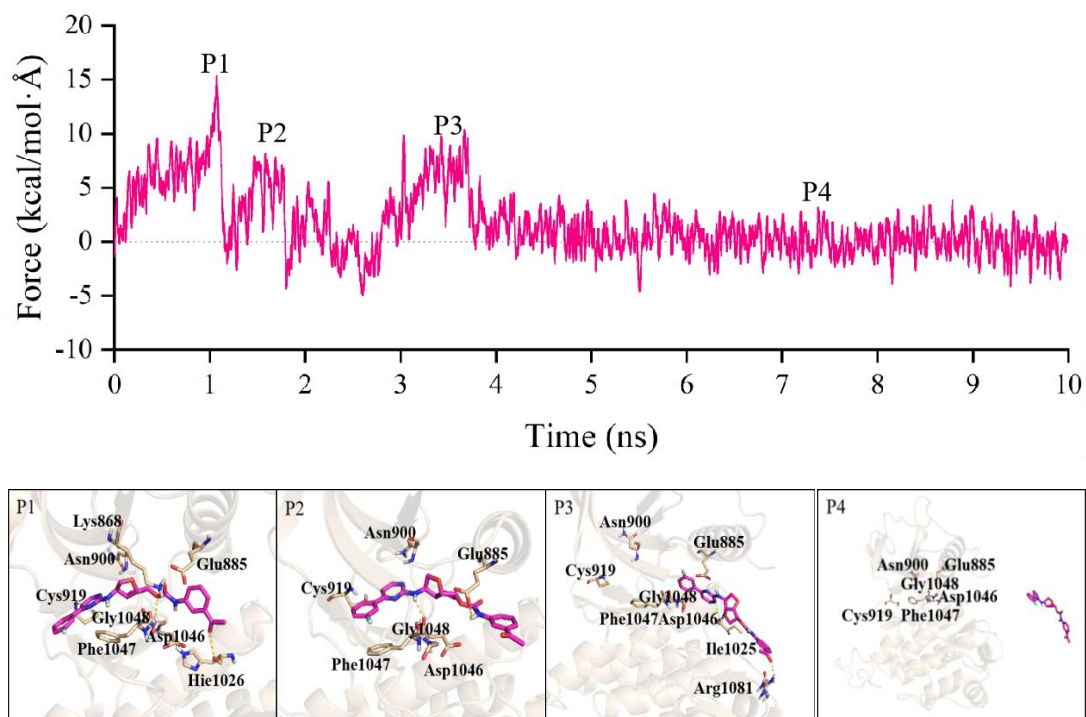

**Figure S9.** Force vs time of CNP0132719 dissociated from the binding site of VEGFR-2 and extracted snapshots for the relative positions of CNP0132719 and VEGFR-2 (A) along ATP channel and (B) along allosteric channel.

(A)

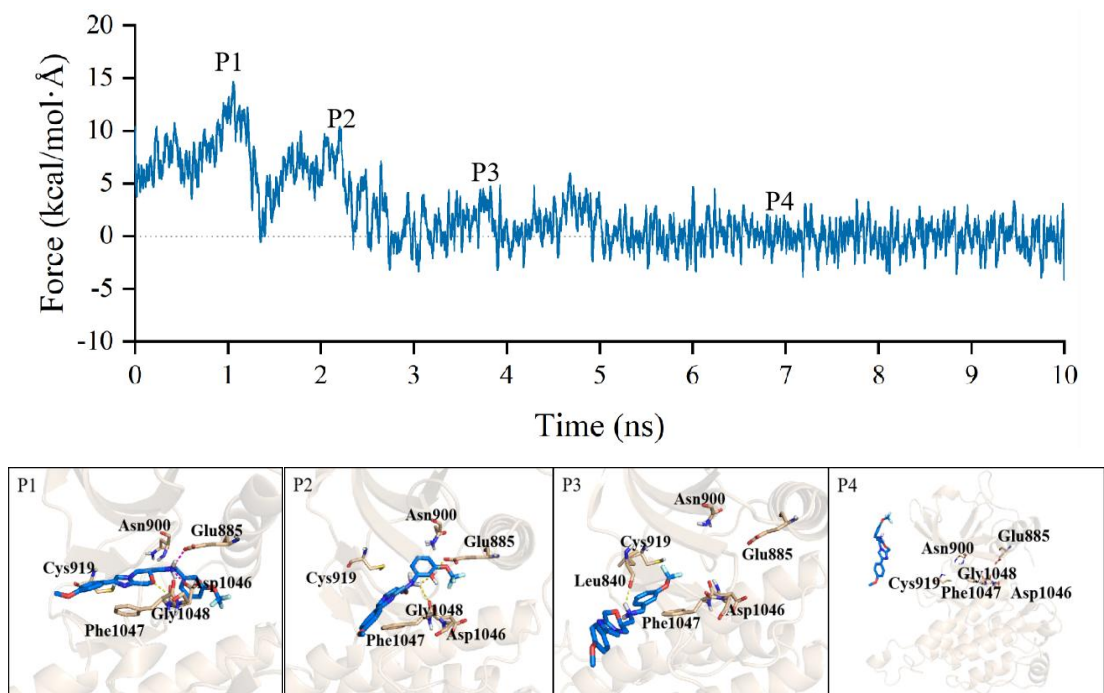

(B)

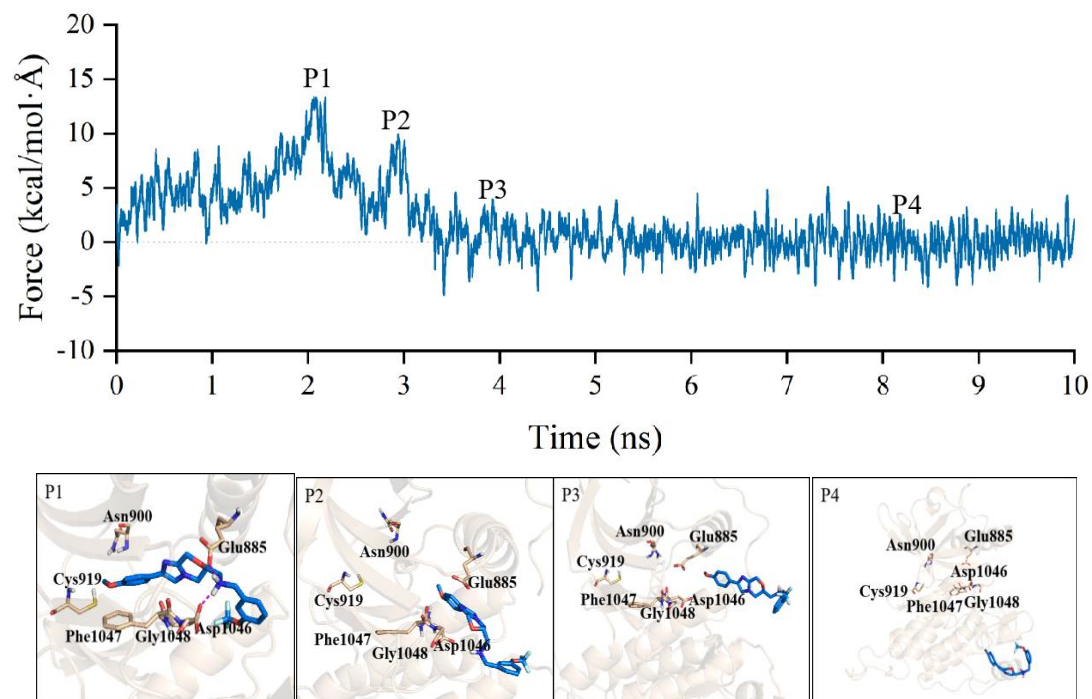

**Figure S10.** Force vs time of CNP0107283 dissociated from the binding site of VEGFR-2 and extracted snapshots for the relative positions of CNP0107283 and VEGFR-2 (A) along ATP channel and (B) along allosteric channel.
